# Supplementary material
Source: bioRxiv or medRxiv preprint supplement (https://medrxiv.org/highwire/filestream/87061/field_highwire_adjunct_files/0/2020.06.22.20137695-1.pdf)
Supplement: Supplementary file [file 2020.06.22.20137695-1.pdf]

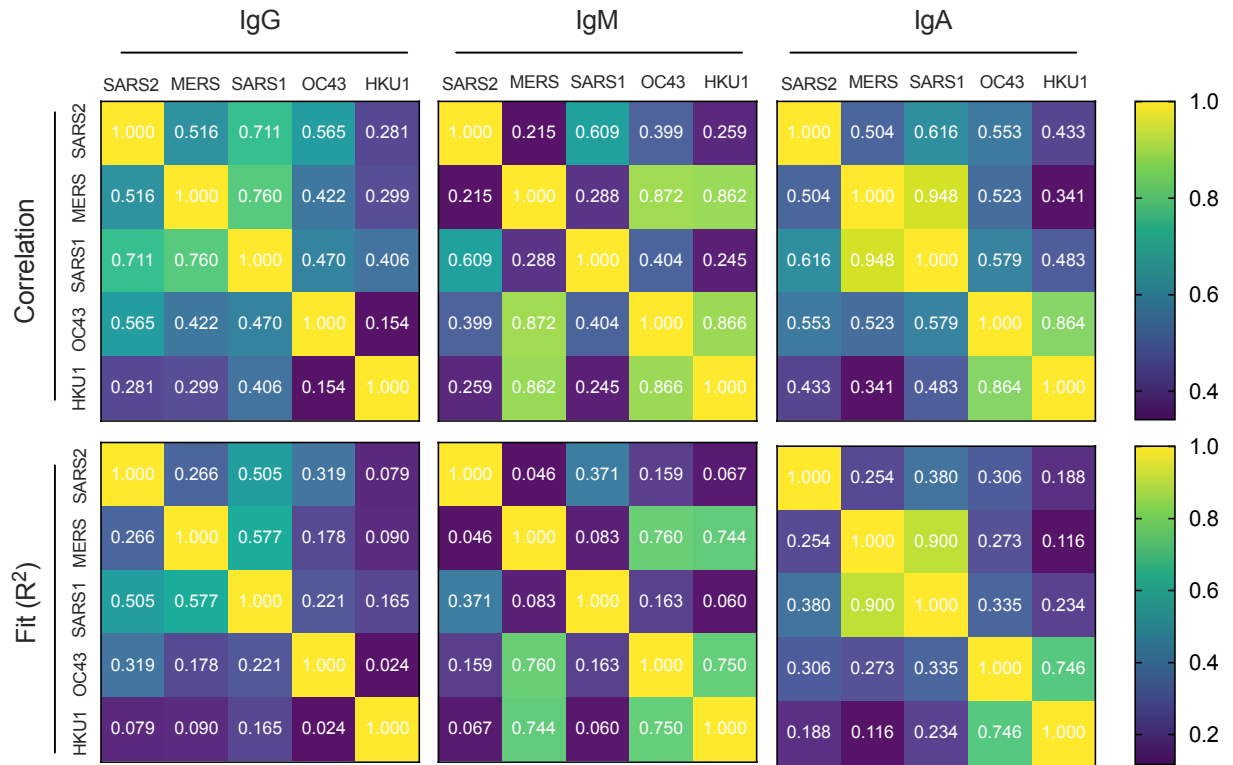

**Supplementary Figure 2: Linear Correlation Statistics of *Betacoronaviruses***

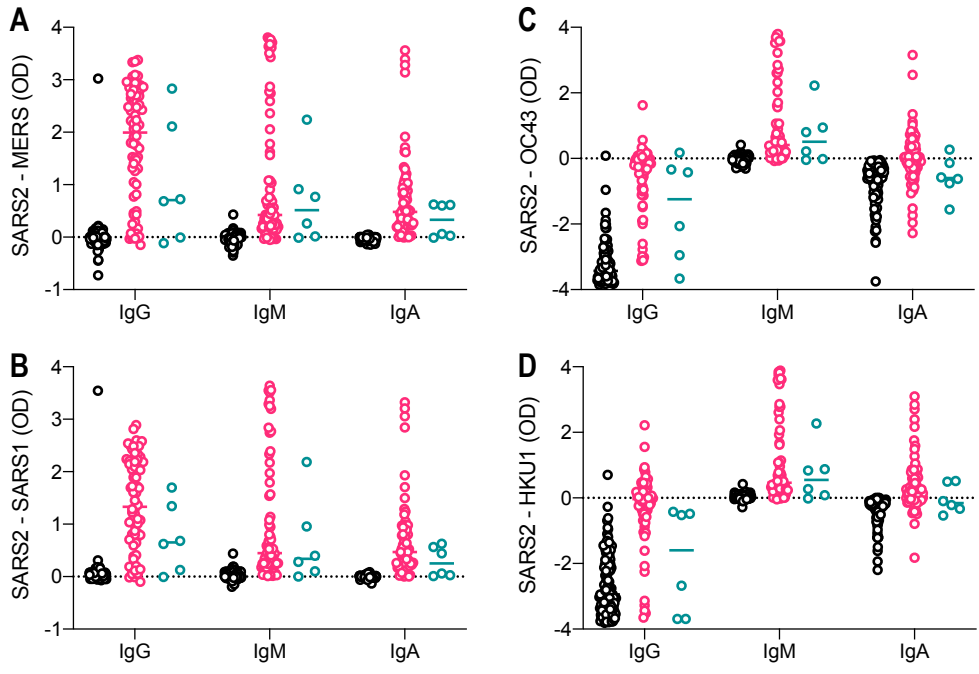

**Supplementary Figure 3: Differential signal intensity of SARS-CoV-2 spike with other *Betacoronaviruses*.** Signal intensity displayed as SARS-CoV-2 absorbance (A450 – A650) minus signal intensity of other *Betacoronaviruses*. (a) MERS, (b) SARS-CoV, (c) OC43, and (d) HKU1. Archival negative = black, pandemic hot-spot symptomatic = pink, pandemic hot-spot asymptomatic = teal. n = 114 archival negative, n = 68 hot-spot symptomatic, n = 6 hot-spot asymptomatic.
